# Supplementary material for: Differential Effects of D9 Tetrahydrocannabinol (THC)- and Cannabidiol (CBD)-Based Cannabinoid Treatments on Macrophage Immune Function In Vitro and on Gastrointestinal Inflammation in a Murine Model
Source: MDPI journal article supplement (doi:10.3390/biomedicines10081793), 2022-07-26
Supplement: s1 [file s1]

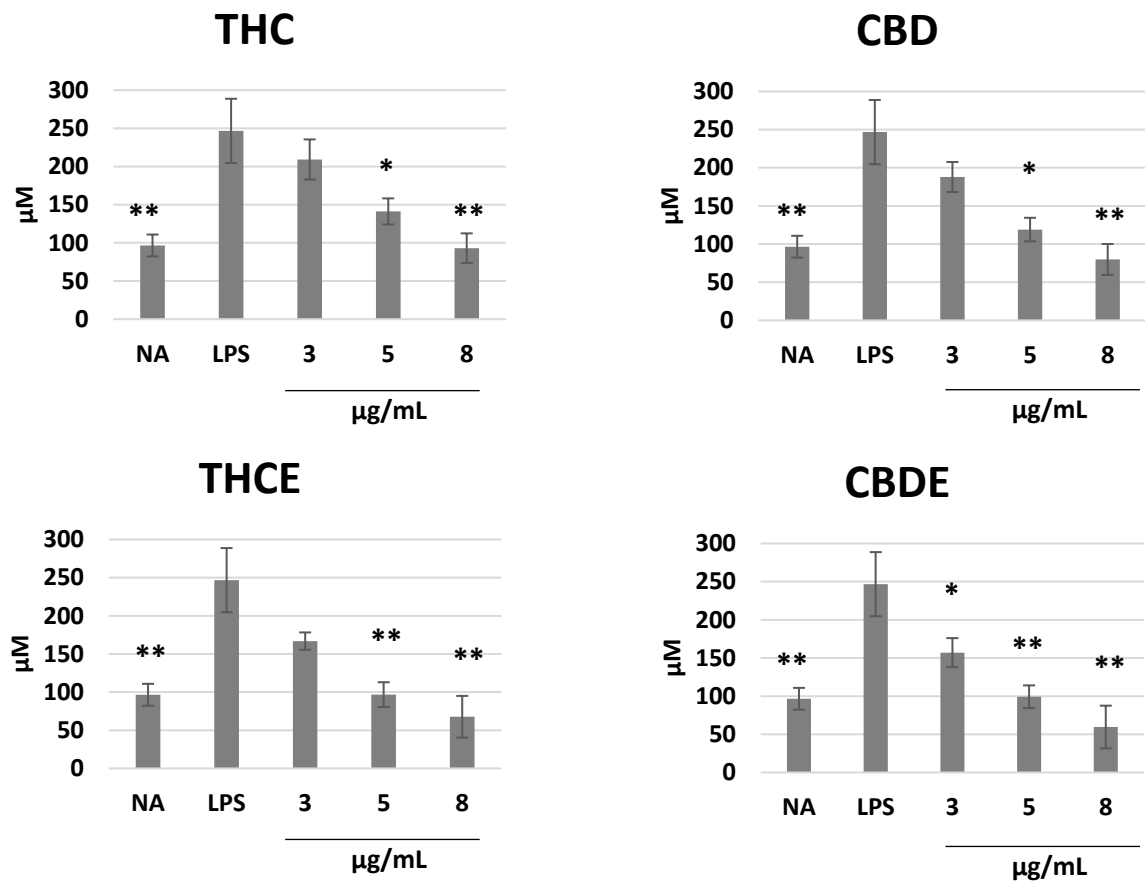

**Figure S1.** Dose dependent inhibition of nitric oxide production by peritoneal macrophages treated with pure CBD/THC or cannabis extracts. Peritoneal macrophages from C57bl/6 female mice were activated for 24h with LPS, in the presence of cannabinoid treatments at the indicated concentrations.  $n = 5$  mice.  $p$  value as compare to activated control cells \*,  $p < 0.05$ ; \*\*,  $p < 0.01$ ; NA- non-activated LPS – lipopolysaccharide activated macrophages, THC- D9 tetrahydrocannabinol , CBD- cannabidiol , THCE- high THC cannabis extract, CBDE- high CBD cannabis extract

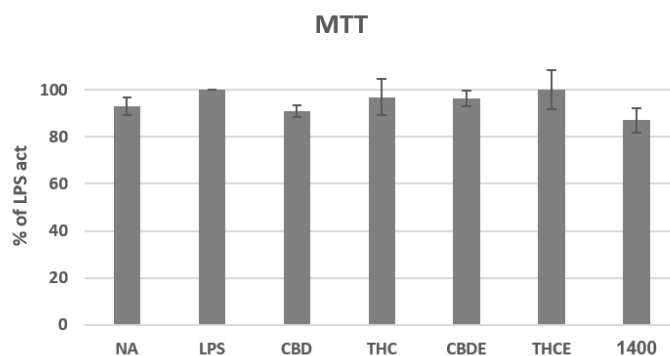

**Figure S2.** The influence of pure CBD/THC and cannabis extracts on the viability of LPS activated peritoneal macrophages. Peritoneal macrophages from female C57bl/6 mice were activated for 24h with

LPS, in the presence of cannabinoid treatments. 1400, a specific iNOS inhibitor, served as control. Cell viability was analyzed using MTT assay. NA- non-activated LPS – lipopolysaccharide activated macrophages, THC- D9 tetrahydrocannabinol , CBD- cannabidiol , THCE- high THC cannabis extract, CBDE- high CBD cannabis extract

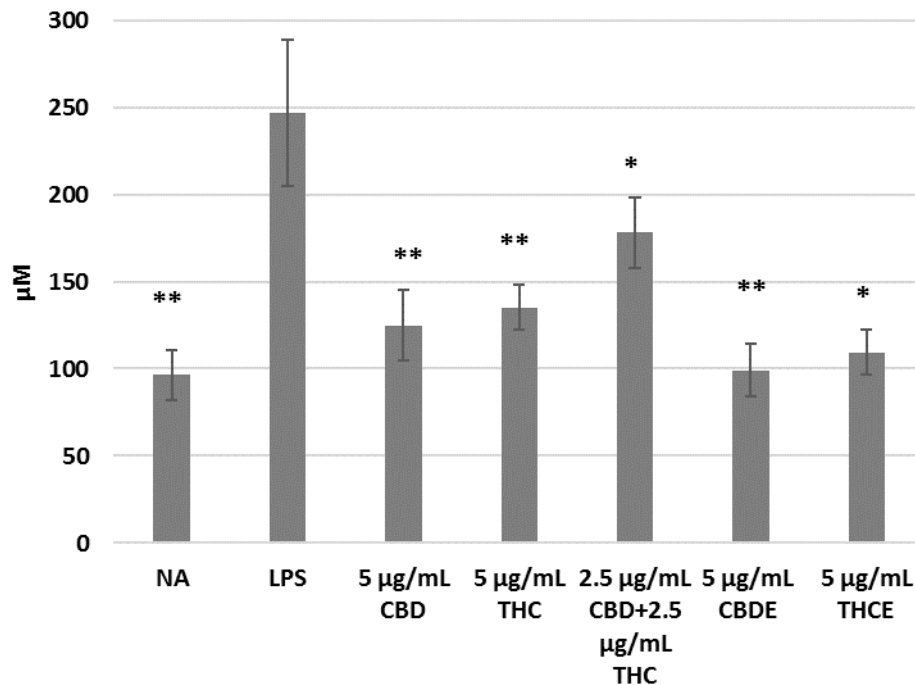

**Figure S3.** Combination of THC and CBD (2.5 μg/mL of each) is less effective than the pure cannabinoids. Peritoneal macrophages from C57bl/6 female mice were activated for 24h with LPS, in the presence of cannabinoid treatments at the indicated concentrations.  $n = 5$  mice. .  $p$  value as compare to activated control cells \*, $< 0.05$ ; \*\*, $< 0.01$ ; NA- non-activated LPS – lipopolysaccharide activated macrophages, THC- D9 tetrahydrocannabinol , CBD- cannabidiol , THCE- high THC cannabis extract, CBDE- high CBD cannabis extract

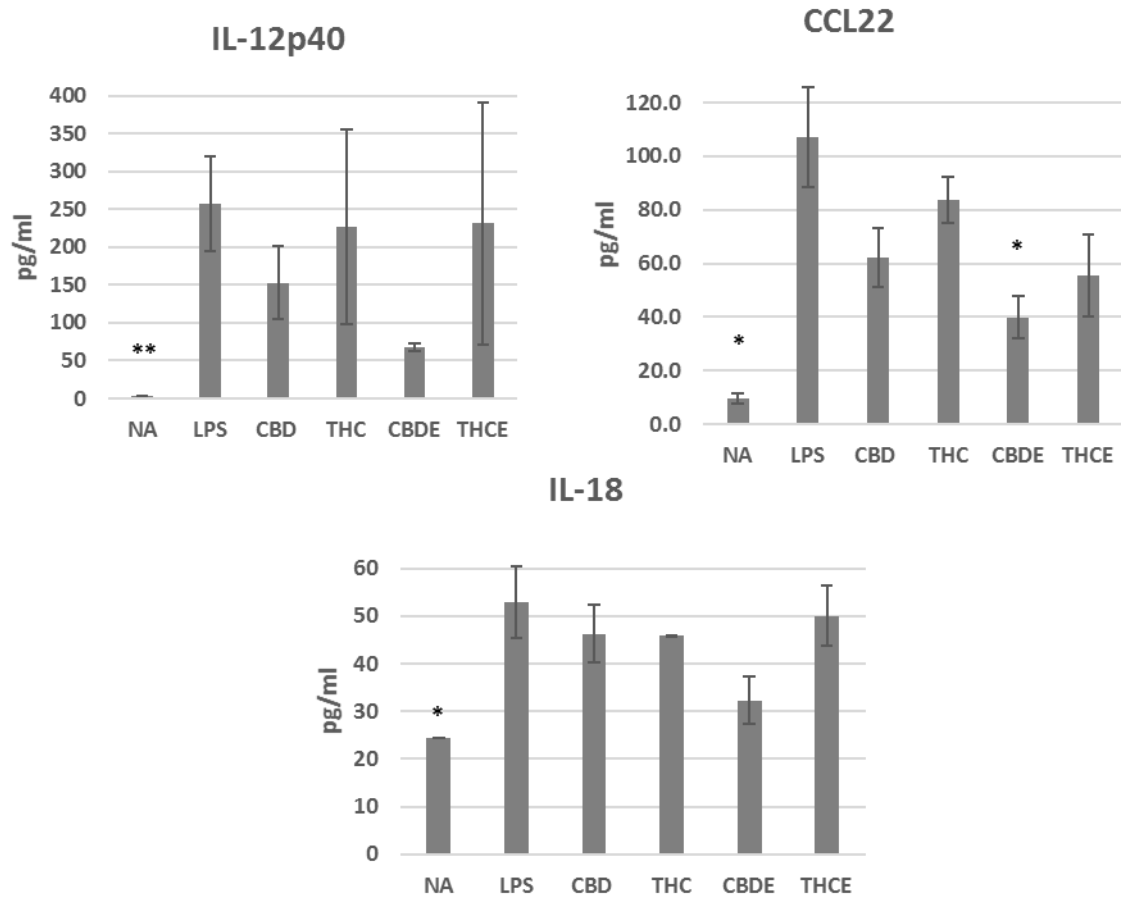

**Figure S4.** The influence of pure CBD/THC and cannabis extracts on cytokine/chemokine production of LPS activated peritoneal macrophages. Peritoneal macrophages were activated for 24h with LPS, in the presence of cannabinoid treatments, as in Figure 1.  $n = 3$  mice. IL12p40, CCL22, and IL18 levels in the culture supernatant were detected. Results are expressed as mean +SEM.  $p$  value as compare to activated control cells \*,  $< 0.05$ ; \*\*,  $< 0.01$ ; NA- non-activated LPS – lipopolysaccharide activated macrophages, THC- D9 tetrahydrocannabinol , CBD- cannabidiol , THCE- high THC cannabis extract, CBDE- high CBD cannabis extract
